# Supplementary material for: A Splicing Variant in RDH8 Is Associated with Autosomal Recessive Stargardt Macular Dystrophy
Source: MDPI journal article supplement (doi:10.3390/genes14081659), 2023-08-21
Supplement: s1 [file s1]

**Supplementary Table S1.** List of genes evaluated in the first-tier analysis

| Gene            | OMIM   |
|-----------------|--------|
| <i>NPHP4</i>    | 607215 |
| <i>DHDDS</i>    | 608172 |
| <i>RPE65</i>    | 180069 |
| <i>ABCA4</i>    | 601691 |
| <i>ARL6</i>     | 608845 |
| <i>SEMA4A</i>   | 607292 |
| <i>CRB1</i>     | 604210 |
| <i>NEK2</i>     | 604043 |
| <i>USH2A</i>    | 608400 |
| <i>ZNF513</i>   | 613598 |
| <i>FAM161A</i>  | 613596 |
| <i>ALMS1</i>    | 606844 |
| <i>SNRNP200</i> | 601664 |
| <i>CNNM4</i>    | 607805 |
| <i>MERTK</i>    | 604705 |
| <i>CERKL</i>    | 608381 |
| <i>SAG</i>      | 181031 |
| <i>IMPG2</i>    | 607056 |
| <i>RHO</i>      | 180380 |
| <i>CLRN1</i>    | 606397 |
| <i>PDE6B</i>    | 180072 |
| <i>PROM1</i>    | 604365 |
| <i>CNGA1</i>    | 123825 |
| <i>LRAT</i>     | 604863 |
| <i>PDE6A</i>    | 180071 |
| <i>MAK</i>      | 154235 |
| <i>TULP1</i>    | 602280 |
| <i>GUCA1A</i>   | 600364 |
| <i>GUCA1B</i>   | 602275 |
| <i>PRPH2</i>    | 179605 |
| <i>EYS</i>      | 612424 |
| <i>RIMS1</i>    | 606629 |
| <i>KLHL7</i>    | 611119 |
| <i>RP9</i>      | 607331 |
| <i>IMPDH1</i>   | 146690 |
| <i>ADAM9</i>    | 602713 |
| <i>RP1</i>      | 603937 |
| <i>CFAP418</i>  | 614477 |
| <i>KCNV2</i>    | 607604 |

|                 |        |
|-----------------|--------|
| <i>TOPORS</i>   | 609507 |
| <i>OFD1</i>     | 300170 |
| <i>PCDH15</i>   | 605514 |
| <i>PDE6G</i>    | 180073 |
| <i>CIB2</i>     | 605564 |
| <i>CDH23</i>    | 605516 |
| <i>CDHR1</i>    | 609502 |
| <i>RGR</i>      | 600342 |
| <i>PDE6C</i>    | 600827 |
| <i>USH1C</i>    | 605242 |
| <i>BEST1</i>    | 607854 |
| <i>ROM1</i>     | 180721 |
| <i>MYO7A</i>    | 276903 |
| <i>CACNA2D4</i> | 608171 |
| <i>RPGRIP1</i>  | 605446 |
| <i>RDH12</i>    | 608830 |
| <i>OPHN1</i>    | 300127 |
| <i>SPATA7</i>   | 609868 |
| <i>TTC8</i>     | 608132 |
| <i>NR2E3</i>    | 604485 |
| <i>RLBP1</i>    | 180090 |
| <i>ARL2BP</i>   | 615407 |
| <i>CNGB1</i>    | 600724 |
| <i>PRPF8</i>    | 607300 |
| <i>AIPL1</i>    | 604392 |
| <i>PITPNM3</i>  | 608921 |
| <i>GUCY2D</i>   | 600179 |
| <i>CA4</i>      | 114760 |
| <i>USH1G</i>    | 607696 |
| <i>PRCD</i>     | 610598 |
| <i>PNPLA6</i>   | 603197 |
| <i>CRX</i>      | 602225 |
| <i>IDH3B</i>    | 604526 |
| <i>PRPF6</i>    | 613979 |
| <i>OPA3</i>     | 606580 |
| <i>ARL6</i>     | 608845 |
| <i>CACNA1F</i>  | 300110 |
| <i>OPA1</i>     | 605290 |
| <i>PRPF3</i>    | 607301 |
| <i>PRPF31</i>   | 606419 |
| <i>RBP3</i>     | 180290 |

|             |        |
|-------------|--------|
| <i>RP2</i>  | 300757 |
| <i>RPGR</i> | 312610 |
